# Supplementary material
Source: publisher figshare collection journal article supplement (https://gsapubs.figshare.com/ndownloader/files/23318801)
Supplement: Supplementary file 1 [file 23318801]

## **Dramatic weakening of the East Asian Summer Monsoon during the transition from the Medieval Warm Period to the Little Ice Age**

Jianghu Lan, Hai Xu, Yunchao Lang, Keke Yu, Peng Zhou, Shugang Kang, Kangen Zhou, Xulong Wang, Tianli Wang, Peng Cheng, Dongna Yan, Shiyong Yu, Ping Che, Yuanda Ye, Liangcheng Tan

Corresponding author Email: xuhai@tju.edu.cn or lanj@ieecas.cn or tanlch@ieecas.cn

### **Supplementary Materials and Methods**

#### **Location.**

Lake Zhongquanzi (Lake ZQZ; lat. 39°20'N, long. 102°40'E, alt. 1232 m a.s.l.) is located in the northernmost part of the Minqin Basin, between the Badain Jaran Desert and the Tengger Desert, in arid northern China. It is a terminal lake of the Shiyang River, which originates from the Qilian Mountains, northeastern Tibet Plateau, and is dry at present (Figs. 1 and S1).

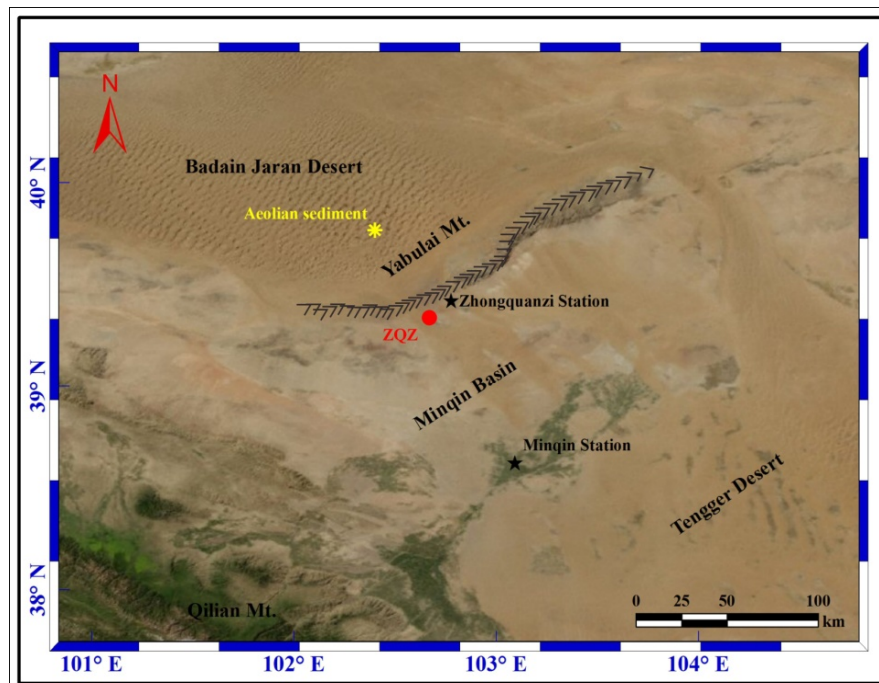

Fig. S1. Location of the study site

### Modern Climatic Characteristics.

Modern climatology of Lake ZQZ was evaluated using a 52-yr record (1956-2007 AD) of precipitation and temperature from two meteorological stations located 5 km to the northeast (Zhongquanzi) and 90 km to the south (Minqin) of the lake (Fig. S1). Mean annual precipitation in the Minqin area is ~109 mm (data from Minqin meteorological station for 1956-2007 AD), with ~80% falling between June and September (Figs. S2a and S3). The results of a water vapor trajectory analysis (HYSPLIT Trajectory Model) suggest that the water vapor is supplied by the Asian monsoon from the south between June and September, and by the westerlies and/or winter monsoon from west and/or northwest during the other seasons (Figs. S2a and S3). Changes in precipitation at the Lake ZQZ area are significantly positively correlated with changes in the Minqin Basin during 1956-2007 AD (see the spatial correlation analysis in Fig. S4), and both show a similar trend to that of the mean precipitation over northern China (Fig. S2b; Ding et al., 2008). All of these features suggest that modern climatic changes in the Lake ZQZ area are consistent with and could represent changes in the modern northern Summer Monsoon Limit (SML).

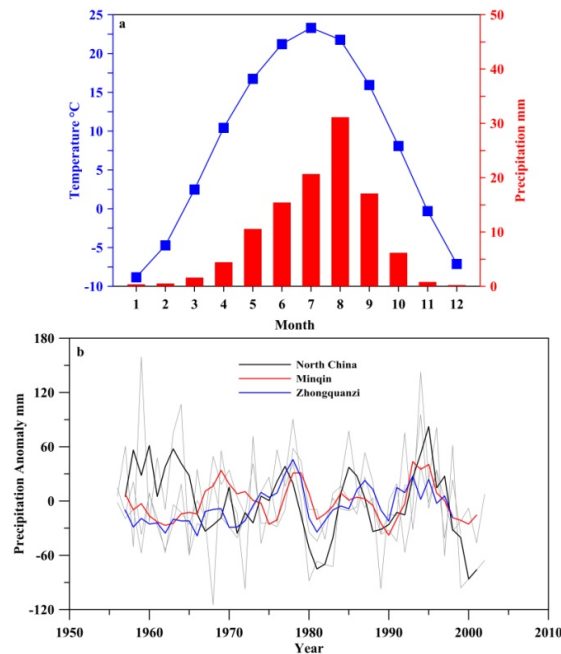

Fig. S2. ZQZ climatology. (a) The 52-yr (1956-2007 AD) monthly averages of precipitation (red bars) and temperature (blue solid line) for the Minqin meteorological station. (b) 3-yr smoothed JJA (June-August) precipitation anomaly for North China (black solid line; Ding et al., 2008) and Minqin (red solid line), calculated from 1956 to 2000 average, and 3-yr smoothed annual precipitation anomaly for Zhongquanzi (blue solid line; Zhao et al., 2008).

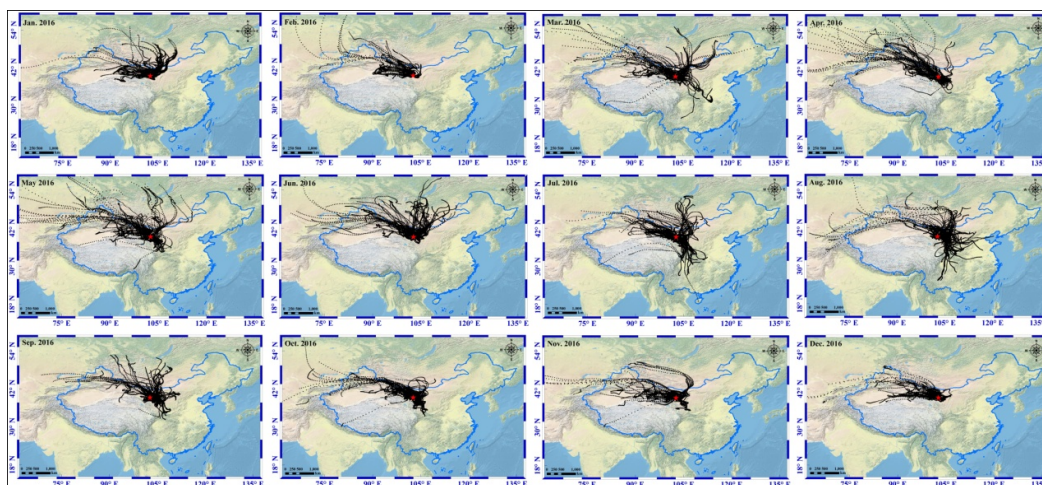

Fig. S3. HYSPLIT Trajectory Model analysis (GDAS 1degree; <http://ready.arl.noaa.gov/hypub-bin/trajsrc.pl>) from Lake ZQZ for 2016.

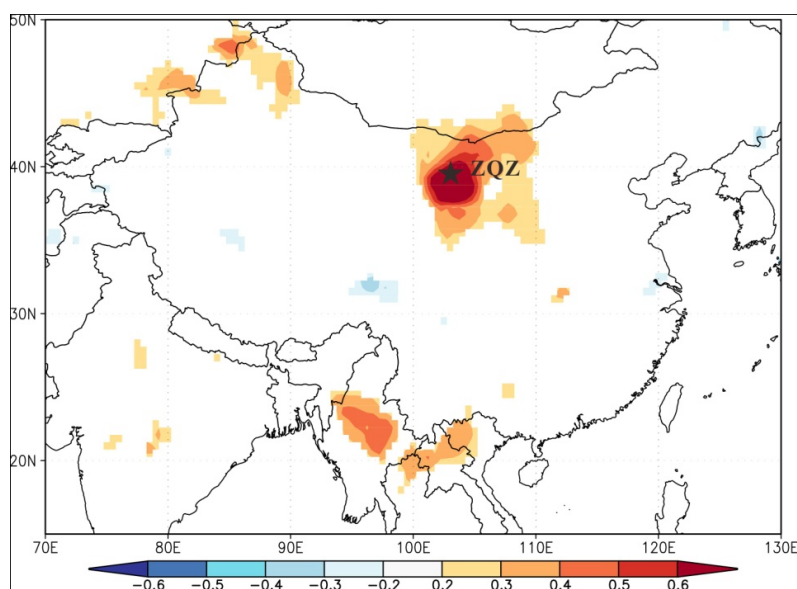

Fig. S4. Spatial correlation between annual precipitation in the Lake ZQZ area and the CRU TS3.24.01 precipitation grid datasets for 1956-2007. The star indicates the location of the Lake ZQZ profile. The scale shows correlation coefficients represented by different colors. The analysis was performed using the KNMI Climate Explorer (<http://climexp.knmi.nl>).

### Sample Collection and Lithology.

The ZQZ profile is 533 cm long (Fig. S5a) and was sampled *in situ* at an interval of 5 cm during field investigation in 2011, and this revealed changes in lithology (color, grain size, and composition; Fig. S5) as follows:

0~20 cm depth: aeolian sand.

20~100 cm: sodium sulfate with sand.

100~233 cm: light-brown fine-sand layers.

233~303 cm: light clay layers with a different lithology to overlying and underlying sediments.

Below 303 cm: interbedded light-brown fine-sand to silt layers.

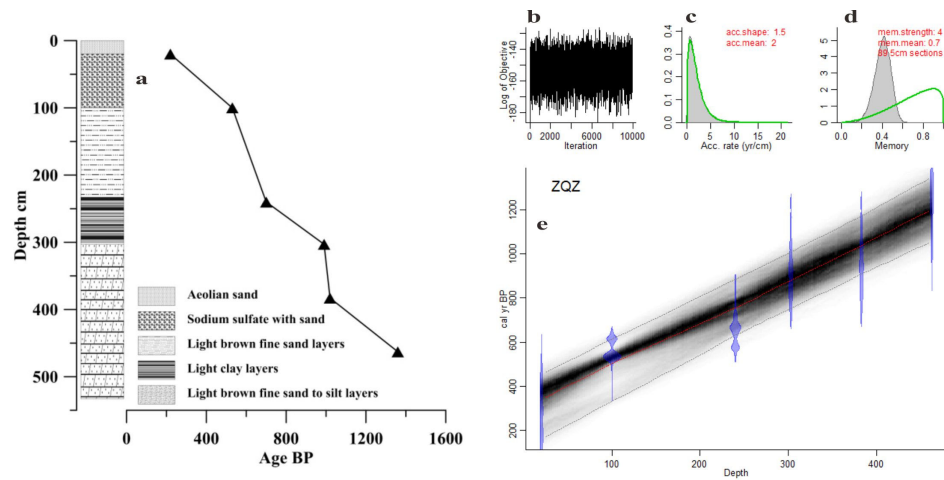

Fig. S5 Lithology (a) and OSL age model (e) for the Lake ZQZ profile. The six quartz OSL ages were used in a Bayesian age-depth model in Bacon (Blaauw and Christen, 2011). Results from Markov Chain Monte Carlo (MCMC) iterations, the distributions of accumulation rate prior and its memory (Fig. S5b-d) indicate the reliability of using the Bayesian age-depth model for the late Holocene chronology construction.

### Dating Method.

Six luminescence samples were collected and dated using the Optically Stimulated Luminescence (OSL) dating technique, with sample IEE3614 measured using the coarse (90-125  $\mu\text{m}$ ) quartz single-aliquot regenerative-dose (SAR) approach (Murray and Wintle, 2000; Wintle and Murray, 2006), and the rest measured using the fine-grained (4~11  $\mu\text{m}$ ) quartz sensitivity-corrected multiple-aliquot regenerative-dose (MAR) protocol (Lu et al., 2007; Kang et al., 2012), at the Institute of Earth Environment, Chinese Academy of Sciences. The six quartz OSL ages were used in a Bayesian age-depth model in Bacon to establish the age model of the Lake ZQZ profile (Fig. S5e; Blaauw and Christen, 2011), and then were transferred to Common Era (Madsen and Murray, 2009). The results show that the profile spans 360 AD to present, and contains the DACP, MWP, and LIA periods (Figs. 2 and S5e).

### Multi-Proxy Analysis.

All 83 samples were analyzed for LOI<sub>550°C</sub>, LOI<sub>950°C</sub>, carbonate content, grain size, and magnetic susceptibility at the Institute of Earth Environment, Chinese Academy of Sciences. The LOI was calculated as follows:

$$\text{LOI}_{550^{\circ}\text{C}} (\%) = (M_2 - M_3) \times 100 / (M_2 - M_1)$$

$$\text{LOI}_{950^{\circ}\text{C}} (\%) = (M_3 - M_4) \times 100 / (M_2 - M_1)$$

where  $M_1$ ,  $M_2$ ,  $M_3$ , and  $M_4$  are the net weight of the porcelain crucibles after ignition at 550°C, the weight of  $M_1$  plus the weight of sample after drying at 105°C, the weight of  $M_2$  after ignition for 4 hours at 550°C, and the weight of  $M_3$  after ignition for 2 hours at 950°C, respectively.

The carbonate content was titrated with diluted HCl (0.1 mol/L; Xu et al., 2015a, 2015b). Sediment samples were pretreated with diluted H<sub>2</sub>O<sub>2</sub> (10%) to remove organic matter, and then grain size was measured using a Malvern Mastersizer 2000 laser particle size analyzer, with an experimental error of <3% (Sun et al., 2012). The magnetic susceptibility of ZQZ sediments was determined using a Bartington Meter (Model MS2; Xu et al., 2015b).

### Climatic Significance of Proxy Indices.

Here, we present results for LOI<sub>550°C</sub> and LOI<sub>950°C</sub>, carbonate content, grain size, and magnetic susceptibility. LOI<sub>550°C</sub> and LOI<sub>950°C</sub> values are widely recognized as indicators of organic matter content and carbonate content, respectively, in lacustrine sediments (Dean, 1974; Heiri et al., 2001; Santisteban et al., 2004). Organic matter in lacustrine sediments principally comes from two sources (Talbot and Johannessen, 1992; Meyers, 1994): autochthonous (aquatic plants living in the lake) and allochthonous (terrestrial plants from within the catchment). Data from well-studied lakes in the marginal monsoon region suggest that organic matter in lacustrine sediments can be used to infer changes of precipitation in the lake catchment and/or the amount of water input to lake, and thus generating fluctuations in lake level (Xu et al., 2006; Xiao et al., 2006, 2008). Therefore, organic matter content and thus LOI<sub>550°C</sub> can serve as a measure of precipitation/moisture and/or lake level change, triggered by changes in the EASM in the marginal monsoon region.

Generally, the carbonate precipitation rate in a lake is controlled mainly by the ratio of evaporation to precipitation (E/P), where higher E/P ratios may lead to the super-saturation of carbonate in the lake water and correspond to higher carbonate precipitation rates, and vice versa. Hence, a series of studies has supported the idea that variations in carbonate content in lake sediments are an indicator of E/P or regional effective moisture (Chen et al., 2006; Xu et al., 2006). However, rates of carbonate precipitation in the ZQZ region, which are high, perhaps due to high dissolved Ca<sup>2+</sup> concentrations in runoff regulated by intense chemical weathering

under warm-wet climatic condition (Jin et al., 2002), are inversely correlated with climatic parameters; e.g., higher (lower) carbonate contents and/or LOI<sub>950°C</sub> indicate higher (lower) precipitation.

Variations in grain size in lacustrine sediments from arid/semiarid regions may reflect changes in transport energy related to variations in regional precipitation (Peng et al., 2005; Qiang et al., 2007; Xiao et al., 2009; Chen et al., 2013); i.e., a larger silt size (sandy or coarse) fraction reflects increased monsoonal precipitation (aeolian deposition).

Magnetic susceptibility in lake sediment records is typically used as an indicator of amount of the clastic material washed into the lake from its catchments (Snowball et al., 1999; Liu et al., 2014). Increased runoff under humid conditions will transport more clastic material into the lake, and thus promote higher magnetic susceptibility values in lake sediments. Conversely, lower magnetic susceptibility values may correspond with intervals of decreased runoff.

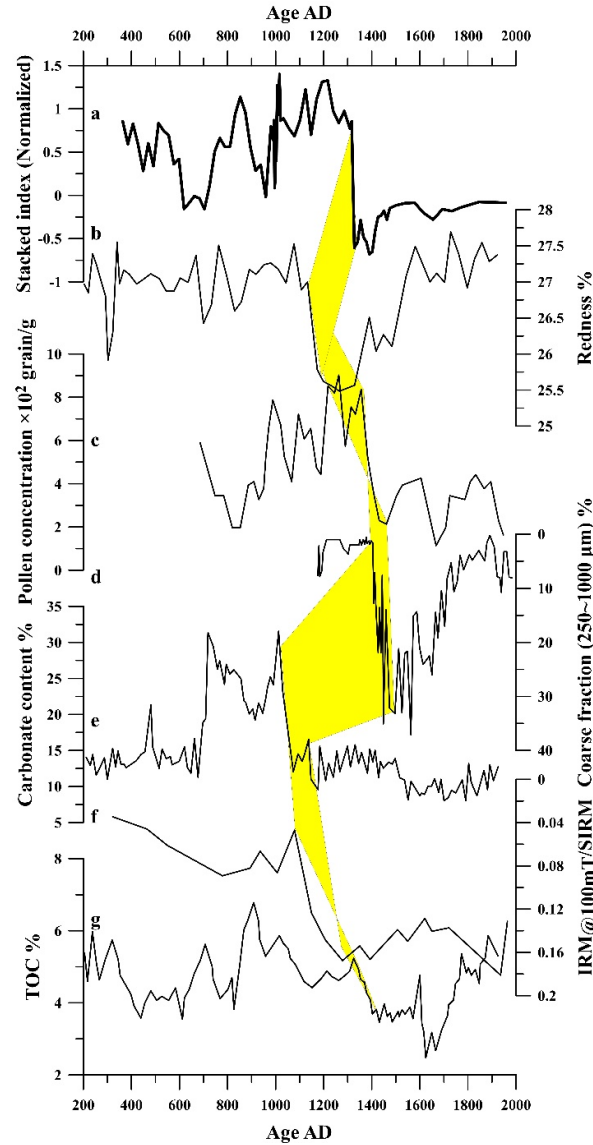

Fig. S6 Raw data showing a weakening in EASM intensity, as recorded from the marginal summer monsoon region: (a) normalized stacked index (*this study*); (b) sediment redness of Lake Qinghai (Ji et al., 2005); (c) pollen concentrations of Lake Gouchi (Meng et al., 2009); (d) coarse fraction of Lake Bojianghaizi (Yang and Zhang, 1997); (e) carbonate content of Lake Daihai (Jin et al., 2002); (f)  $IRM_{@100mT}/SIRM$  of Lake Xiarinur (Tang et al., 2015); and (g) TOC of Lake Dali (Xiao et al., 2008).

**Table S1** Proxies of Hydroclimate Records Mentioned in this Study



| Site no. | Site name           | Lat.(°N) | Long.(°E) | Proxies used                                                             | References                               |
|----------|---------------------|----------|-----------|--------------------------------------------------------------------------|------------------------------------------|
| 1        | Aral Sea            | 45.01    | 59.49     | Dinoflagellate cysts                                                     | Sorrel et al., 2006                      |
| 2        | Lake Sasikul        | 37.69    | 73.18     | $\delta^{18}\text{O}$ , TIC                                              | Lei et al., 2014                         |
| 3        | Lake Issky-Kul      | 42.43    | 77.36     | Historical map                                                           | Narama et al., 2010                      |
| 4        | Lake Ebinur         | 44.88    | 83.18     | $\delta^{18}\text{O}_{\text{carb}}$ , $\delta^{13}\text{C}_{\text{org}}$ | Ma et al., 2011                          |
| 5        | Lake Bosten         | 41.99    | 87.08     | Carbonate content                                                        | Chen et al., 2006                        |
| 6        | Guliya ice core     | 35.20    | 81.15     | Annual net accumulation                                                  | Thompson et al., 1995                    |
| 7        | Eastern Tarim Basin | 39.77    | 88.38     | Plant $\delta^{13}\text{C}$                                              | Liu et al., 2010                         |
| 8        | Lake Sugan          | 38.85    | 93.87     | Chironomid                                                               | Chen et al., 2009; He et al., 2013       |
| 9        | Dunde ice core      | 37.27    | 96.53     | Pollen                                                                   | Liu et al., 1998                         |
| 10       | Delingha tree ring  | 37.27    | 97.53     | $\delta^{18}\text{O}$                                                    | Wang et al., 2013                        |
| 11       | Lake Gahai          | 37.12    | 97.55     | $\%C_{37-4}$                                                             | He et al., 2013                          |
| 12       | Aeolian sediment    | 39.77    | 102.40    | Chloride concentration in unsaturated zone                               | Ma and Edmunds, 2006; Gates et al., 2008 |
| 13       | Lake Tengernuur     | 42.43    | 110.68    | Artemisia/Chenopodiaceae ratio                                           | Zhao et al., 2011                        |
| 14       | ZQZ                 | 39.34    | 102.67    | LOI, carbonate content, grain size and magnetic susceptibility           | <i>This study</i>                        |
| 15       | Lake Qinghai        | 36.88    | 100.18    | Redness                                                                  | Ji et al., 2005                          |
| 16       | Lake Gouchi         | 37.73    | 107.50    | Pollen                                                                   | Meng et al., 2009                        |
| 17       | Lake Bojianghaizi   | 39.78    | 109.30    | Grain size                                                               | Yang and Zhang, 1997                     |
| 18       | Lake Dahai          | 40.57    | 112.68    | Carbonate content                                                        | Jin et al., 2002                         |
| 19       | Lake Xiarinur       | 42.62    | 115.47    | Mineral magnetic parameter                                               | Tang et al., 2015                        |
| 20       | Lake Dali           | 43.27    | 116.63    | TOC                                                                      | Xiao et al., 2008                        |
| 21       | Wanxiang Cave       | 33.32    | 105.00    | $\delta^{18}\text{O}$                                                    | Zhang et al., 2008                       |
| 22       | Huangye Cave        | 33.58    | 105.12    | $\delta^{18}\text{O}$                                                    | Tan et al., 2011                         |
| 23       | Longxi              | 35.45    | 104.78    | Historical document                                                      | Tan et al., 2008                         |
| 24       | Lake Gonghai        | 38.9     | 112.23    | Magnetical parameter and pollen                                          | Liu et al., 2011                         |
| 25       | Northern China      | 36.40    | 115.12    | Historical document                                                      | Man, 2009                                |
| 26       | Shihua Cave         | 39.83    | 115.67    | Thickness of stagamite lamina                                            | Qin et al., 1999                         |
| 27       | Maili Bog           | 42.87    | 122.88    | Pollen                                                                   | Ren, 1998                                |
| 28       | Lake Xiaolongwan    | 42.30    | 126.35    | $\delta^{13}\text{C}_{\text{org}}$                                       | Chu et al., 2009                         |
| 29       | South Korea         | 37.82    | 127.00    | Historical document                                                      | Kim and Choi, 1987                       |

**Table S2** Optically stimulated luminescence ages and related parameters for the Lake ZQZ profile

| Laboratory no. | Depth (cm) | U (ppm) | Th (ppm) | K (%) | Water content (%) | Equivalent dose (Gy) | Dose rate (Gy/ka) | Age (AD) |
|----------------|------------|---------|----------|-------|-------------------|----------------------|-------------------|----------|
| IEE3614        | 20         | 1.90    | 5.29     | 1.51  | 10±5              | 0.54±0.35            | 2.49±0.09         | 1791±140 |
| IEE3615        | 100        | 1.98    | 4.63     | 1.12  | 15±5              | 1.19±0.05            | 2.27±0.13         | 1481±40  |
| IEE3616        | 240        | 8.35    | 8.67     | 1.79  | 15±5              | 3.64±0.14            | 5.21±0.41         | 1311±60  |
| IEE3617        | 303        | 15.64   | 3.26     | 1.91  | 15±5              | 7.11±0.10            | 7.15±0.74         | 1021±100 |
| IEE3618        | 383        | 15.02   | 3.91     | 2.10  | 25±5              | 6.65±0.10            | 6.50±0.63         | 991±100  |
| IEE3619        | 463        | 17.39   | 3.52     | 1.98  | 25±5              | 9.58±0.13            | 7.05±0.73         | 651±140  |

## References Cited

- Blaauw, M., and Christen, J. A., 2011, Flexible Paleoclimate Age-Depth Models Using an Autoregressive Gamma Process: Bayesian Analysis, v. 6, no. 3, p. 457-474, doi: 10.1214/11-Ba618.
- Chen, F., Huang, X., Zhang, J., Holmes, J. A., and Chen, J., 2006, Humid Little Ice Age in arid central Asia documented by Bosten Lake, Xinjiang, China: Science in China Series D: Earth Sciences, v. 49, no. 12, p. 1280-1290, doi: 10.1007/s11430-006-2027-4.



- Chen, F., Qiang, M., Zhou, A., Xiao, S., Chen, J., and Sun, D., 2013, A 2000-year dust storm record from Lake Sagan in the dust source area of arid China: *Journal of Geophysical Research: Atmospheres*, v. 118, no. 5, p. 2149-2160, doi: 10.1002/jgrd.50140.
- Dean, W. E., 1974, Determination of carbonate and organic matter in calcareous sediments and sedimentary rocks by Loss on Ignition - Comparison with other methods: *Journal of Sedimentary Petrology*, v. 44, no. 1, p. 242-248, doi: 10.1306/74D729D2-2B21-11D7-8648000102C1865D.
- Ding, Y. H., Wang, Z. Y., and Sun, Y., 2008, Inter-decadal variation of the summer precipitation in East China and its association with decreasing Asian summer monsoon. Part I: Observed evidences: *International Journal of Climatology*, v. 28, no. 9, p. 1139-1161, doi: 10.1002/Joc.1615.
- Heiri, O., Lotter, A. F., and Lemcke, G., 2001, Loss on ignition as a method for estimating organic and carbonate content in sediments: reproducibility and comparability of results: *Journal of Paleolimnology*, v. 25, no. 1, p. 101-110, doi: 10.1023/A:1008119611481.
- Ji, J., Shen, J., Balsam, W., Chen, J., Liu, L., and Liu, X., 2005, Asian monsoon oscillations in the northeastern Qinghai-Tibet Plateau since the late glacial as interpreted from visible reflectance of Qinghai Lake sediments: *Earth and Planetary Science Letters*, v. 233, no. 1, p. 61-70, doi: 10.1016/j.epsl.2005.02.025.
- Jin, Z., Shen, J., Wang, S., and Zhang, E., 2002, The Medieval Warm Period in the Daihai area: *Journal of Lake Sciences*, v. 14, no. 3, p. 209-216.
- Kang, S. G., Wang, X. L., and Lu, Y. C., 2012, The estimation of basic experimental parameters in the fine-grained quartz multiple-aliquot regenerative-dose OSL dating of Chinese loess: *Radiation Measurements*, v. 47, no. 9, p. 674-681, doi: 10.1016/j.radmeas.2012.01.009.
- Liu, X., Herzschuh, U., Wang, Y., Kuhn, G., and Yu, Z., 2014, Glacier fluctuations of Muztagh Ata and temperature changes during the late Holocene in westernmost Tibetan Plateau, based on glaciolacustrine sediment records: *Geophysical Research Letters*, v. 41, no. 17, p. 6265-6273, doi: 10.1002/2014GL060444.
- Lu, Y. C., Wang, X. L., and Wintle, A. G., 2007, A new OSL chronology for dust accumulation in the last 130,000 yr for the Chinese Loess Plateau: *Quaternary Research*, v. 67, no. 1, p. 152-160, doi: 10.1016/j.yqres.2006.08.003.
- Madsen, A. T., and Murray, A. S., 2009, Optically stimulated luminescence dating of young sediments: A review: *Geomorphology*, v. 109, no. 1-2, p. 3-16, doi: 10.1016/j.geomorph.2008.08.020.
- Meng, H., Ma, Y., Wang, W., and Sang, Y., 2009, Vegetation and environment change based on high resolution pollen records of the last 2400 years in Dingbian, Shaanxi Province, China: *Quaternary Sciences*, v. 29, no. 5, p. 931-942.
- Meyers, P. A., 1994, Preservation of elemental and isotopic source identification of sedimentary organic-matter: *Chemical Geology*, v. 114, no. 3-4, p. 289-302, doi: 10.1016/0009-2541(94)90059-0.
- Murray, A. S., and Wintle, A. G., 2000, Luminescence dating of quartz using an improved single-aliquot regenerative-dose protocol: *Radiation Measurements*, v. 32, no. 1, p. 57-73, doi: 10.1016/S1350-4487(99)00253-X.
- Peng, Y. J., Xiao, J., Nakamura, T., Liu, B. L., and Inouchi, Y., 2005, Holocene East Asian monsoonal precipitation pattern revealed by grain-size distribution of core sediments of Daihai Lake in Inner Mongolia of north-central China: *Earth and Planetary Science Letters*, v. 233, no. 3-4, p. 467-479, doi: 10.1016/j.epsl.2005.02.022.

- Qiang, M. R., Chen, F. H., Zhang, J. W., Zu, R. P., Jin, M., Zhou, A. F., and Xiao, S., 2007, Grain size in sediments from Lake Sugan: a possible linkage to dust storm events at the northern margin of the Qinghai-Tibetan Plateau: *Environmental Geology*, v. 51, no. 7, p. 1229-1238, doi: 10.1007/s00254-006-0416-9.
- Santisteban, J. I., Mediavilla, R., Lopez-Pamo, E., Dabrio, C. J., Zapata, M. B. R., Garcia, M. J. G., Castano, S., and Martinez-Alfaro, P. E., 2004, Loss on Ignition: a qualitative or quantitative method for organic matter and carbonate mineral content in sediments? *Journal of Paleolimnology*, v. 32, no. 3, p. 287-299, doi: 10.1023/b:jopl.0000042999.30131.5b.
- Snowball, I., Sandgren, P., and Petterson, G., 1999, The mineral magnetic properties of an annually laminated Holocene lake-sediment sequence in northern Sweden: *The Holocene*, v. 9, no. 3, p. 353-362, doi: 10.1191/095968399670520633.
- Sun, Y. B., Clemens, S. C., Morrill, C., Lin, X. P., Wang, X. L., and An, Z. S., 2012, Influence of Atlantic meridional overturning circulation on the East Asian winter monsoon: *Nature Geoscience*, v. 5, no. 1, p. 46-49, doi: 10.1038/NGEO1326.
- Talbot, M. R., and Johannessen, T., 1992, A high-resolution paleoclimatic record for the last 27,500 years in Tropical West Africa from the carbon and nitrogen isotopic composition of lacustrine organic-matter: *Earth and Planetary Science Letters*, v. 110, no. 1-4, p. 23-37, doi: 10.1016/0012-821X(92)90036-U.
- Tang, L., Wang, X. S., Zhang, S. Q., Chu, G. Q., Chen, Y., Pei, J. L., Sheng, M., and Yang, Z. Y., 2015, High-resolution magnetic and palynological records of the last deglaciation and Holocene from Lake Xiarinur in the Hunshandake Sandy Land, Inner Mongolia: *The Holocene*, v. 25, no. 5, p. 844-856, doi: 10.1177/0959683615571426.
- Wintle, A. G., and Murray, A. S., 2006, A review of quartz optically stimulated luminescence characteristics and their relevance in single-aliquot regeneration dating protocols: *Radiation Measurements*, v. 41, no. 4, p. 369-391, doi: 10.1016/j.radmeas.2005.11.001.
- Xiao, J., Chang, Z., Si, B., Qin, X., Itoh, S., and Lomtatidze, Z., 2009, Partitioning of the grain-size components of Dali Lake core sediments: evidence for lake-level changes during the Holocene: *Journal of Paleolimnology*, v. 42, no. 2, p. 249-260, doi: 10.1007/s10933-008-9274-7.
- Xiao, J., Si, B., Zhai, D., Itoh, S., and Lomtatidze, Z., 2008, Hydrology of Dali Lake in central-eastern Inner Mongolia and Holocene East Asian monsoon variability: *Journal of Paleolimnology*, v. 40, no. 1, p. 519-528, doi: 10.1007/s10933-007-9179-x.
- Xiao, J., Wu, J., Si, B., Liang, W., Nakamura, T., Liu, B., and Inouchi, Y., 2006, Holocene climate changes in the monsoon/arid transition reflected by carbon concentration in Daihai Lake of Inner Mongolia: *The Holocene*, v. 16, no. 4, p. 551-560, doi: 10.1191/0959683606hl950rp.
- Xu, H., Ai, L., Tan, L. C., and An, Z. S., 2006, Stable isotopes in bulk carbonates and organic matter in recent sediments of Lake Qinghai and their climatic implications: *Chemical Geology*, v. 235, no. 3-4, p. 262-275, doi: 10.1016/j.chemgeo.2006.07.005.
- Xu, H., Yeager, K. M., Lan, J. H., Liu, B., Sheng, E. G., and Zhou, X. Y., 2015a, Abrupt Holocene Indian Summer Monsoon failures: A primary response to solar activity? *The Holocene*, v. 25, no. 4, p. 677-685, doi: 10.1177/0959683614566252.
- Xu, H., Zhou, X. Y., Lan, J. H., Liu, B., Sheng, E. G., Yu, K. K., Cheng, P., Wu, F., Hong, B., Yeager, K. M., and Xu, S., 2015b, Late Holocene Indian summer monsoon variations recorded at Lake Erhai, Southwestern China: *Quaternary Research*, v. 83, no. 2, p. 307-314, doi: 10.1016/j.yqres.2014.12.004.

- Yang, Z., and Zhang, M., 1997, Climatic and environmental changes since 800 a BP in Pojianghaizi Lake area, Ordos Plateau: *Acta Sci Nat Univ Norm Hu'nan*, v. 20, no. 4, p. 74-81.
- Zhao, Y., Yu, Z., Chen, F., and Li, J., 2008, Holocene vegetation and climate change from a lake sediment record in the Tengger Sandy Desert, northwest China: *Journal of Arid Environments*, v. 72, no. 11, p. 2054-2064, doi: 10.1016/j.jaridenv.2008.06.016.
